# Supplementary material
Source: Springer Nature journal article supplement (https://www.springermedizin.de/resource/supplementary/12936_2013_3180_MOESM1_ESM.pdf/9545180)
Supplement: MOESM1 [file 9545180]

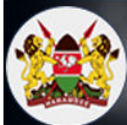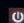[Campaigns](#)[Reports](#)[Help](#)

## Survey Details

## Surveillance indicators

## Dashboard

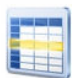[Current Response Level](#)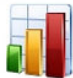[Current Responses](#)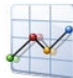[Historical Responses](#)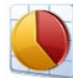[Response Chart](#)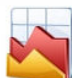[Activity Logs](#)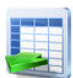[Data Extract](#)[Back to Campaign](#)

12 49

## AL and RDT indicators

|                                  |     |
|----------------------------------|-----|
| Stockout AL Infant (6 tablets)   | 17% |
| Stockout AL Toddler (12 tablets) | 22% |
| Stockout AL Child (18 tablets)   | 22% |
| Stockout AL Adult (24 tablets)   | 22% |
| Stockout RDT                     | 61% |
| One or more AL out of stock      | 22% |
| Total AL stockout                | 17% |

## Surveillance indicators

|                            |     |
|----------------------------|-----|
| Testing rate index         | 32% |
| Test positivity rate index | 33% |
| Appropriate treatment rate | 87% |

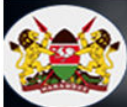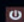[Campaigns](#)[Reports](#)[Admin](#)

| Name                           | Outpatients seen | Patients tested for Malaria | Positive Malaria tests | Treated with an anti-malarial |
|--------------------------------|------------------|-----------------------------|------------------------|-------------------------------|
| <a href="#">Bugamangi Disp</a> | 170              | 0                           | 0                      | 124                           |
| <a href="#">Enzaro Hc</a>      | 311              | 0                           | 0                      | 267                           |
| <a href="#">Iduku Disp</a>     | -                | -                           | -                      | -                             |
| <a href="#">Lyanadinga Hc</a>  | 223              | 84                          | 62                     | 124                           |
| <a href="#">Mbale Rhtc</a>     | 558              | 325                         | 91                     | 120                           |
| <a href="#">Mulele Disp</a>    | 276              | 0                           | 0                      | 246                           |
| <a href="#">Vihiga Dh</a>      | 795              | 492                         | 135                    | 126                           |
| <a href="#">Vihiga Hc</a>      | 298              | 89                          | 15                     | 66                            |
